# Supplementary material for: Characterization of erenumab and rimegepant on calcitonin gene-related peptide induced responses in Xenopus Laevis oocytes expressing the calcitonin gene-related peptide receptor and the amylin-1 receptor
Source: PubMed Central journal article supplement (PMC9134599; doi:10.1186/s10194-022-01425-9), 2022-05-26
Supplement: 10194_2022_1425_MOESM1_ESM.pdf [file 10194_2022_1425_MOESM1_ESM.pdf]

## Supplementary material

*Tabel S1: Summary of studies investigating the antagonistic effect of erenumab on  $\alpha$ -CGRP induced responses on CGRP-R and AMY<sub>1</sub>-R.*

| Cell type      | Receptor                      | Response                                                  | pIC <sub>50</sub> <sup>(I)</sup> ,<br>pEC <sub>50</sub> <sup>(E)</sup> or<br>pA <sub>2</sub> <sup>(A)</sup> | CGRP-R<br>/AMY <sub>1</sub> -R | Reference                       |
|----------------|-------------------------------|-----------------------------------------------------------|-------------------------------------------------------------------------------------------------------------|--------------------------------|---------------------------------|
| <b>MCF-7</b>   | AMY <sub>1</sub> -R           | cAMP<br>(calcitonin)                                      | 6.68 <sup>(I)</sup>                                                                                         | -                              | [13]                            |
| <b>SK-N-MC</b> | CGRP-R                        | cAMP                                                      | 8.64 <sup>(I)</sup>                                                                                         | -                              | [13]                            |
|                | CGRP-R                        | cAMP                                                      | 7.13 <sup>(I)</sup>                                                                                         | -                              | [14]                            |
| <b>HEK 293</b> | CGRP-R                        | Flow<br>cytometry<br>binding                              | 8.64 <sup>(E)</sup>                                                                                         | 18                             | [14]                            |
|                | AMY <sub>1</sub> -R           |                                                           | 7.38 <sup>(E)</sup>                                                                                         |                                |                                 |
| <b>Oocytes</b> | CGRP-R +<br>CFTR              | Chloride<br>current<br>( $\alpha$ -CGRP <sub>8-37</sub> ) | 8.4 <sup>(A)</sup>                                                                                          | -                              | [9]                             |
|                | CGRP-R<br>AMY <sub>1</sub> -R | Chloride<br>current                                       | 10.86 <sup>(I)</sup><br>9.35 <sup>(I)</sup>                                                                 | 32                             | La Cour et al.<br>Current study |

*If nothing else is mentioned in the response column, the agonist used is  $\alpha$ -CGRP and the antagonist is erenumab.*

*Tabel S2: Summary of studies investigating the antagonistic effect of rimegepant on  $\alpha$ -CGRP induced responses on CGRP-R and AMY<sub>1</sub>-R.*

| Cell type      | Receptor                      | Response            | pIC <sub>50</sub> | Ratio<br>CGRP-R<br>/AMY <sub>1</sub> -R | References                      |
|----------------|-------------------------------|---------------------|-------------------|-----------------------------------------|---------------------------------|
| <b>Cos7</b>    | CGRP<br>AMY <sub>1</sub> -R   | cAMP                | 8.00<br>6.77      | 17                                      | [15]                            |
| <b>Oocytes</b> | CGRP-R<br>AMY <sub>1</sub> -R | Chloride<br>current | 11.30<br>9.91     | 25                                      | La Cour et al.<br>Current study |
